# Supplementary material
Source: PubMed Central journal article supplement (PMC4180632)
Supplement: NIHMS600709-supplement-01.pdf [file NIHMS600709-supplement-01.pdf]

## Supplemental Data

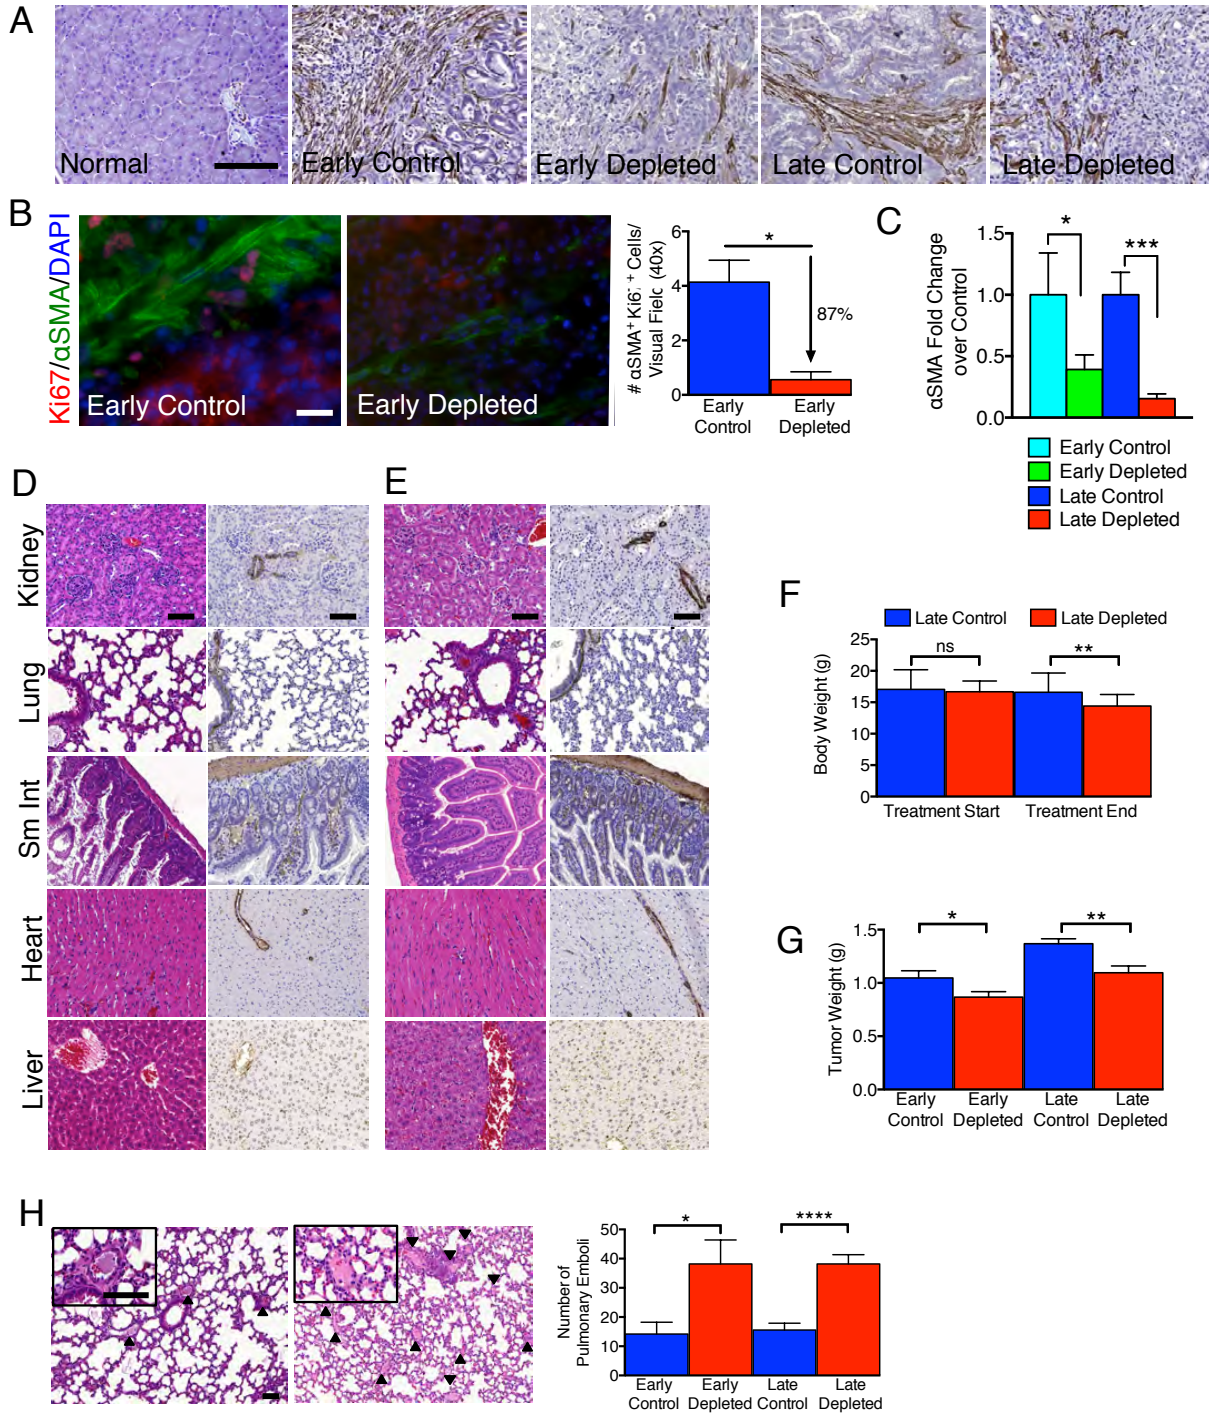

**Figure S1, Related to Figure 1. Phenotypic characterization of myofibroblast-depleted tumors from PKT mice**

(A) Representative micrographs of  $\alpha$ SMA stained pancreatic samples (scale bar: 100  $\mu$ m). (B) Representative micrographs (scale bar: 100  $\mu$ m) of Ki-67/ $\alpha$ SMA double-immunofluorescence

and corresponding quantification. Control, n=4; Depleted, n=6. **(C)** Relative  $\alpha$ SMA expression in early and late treated PDAC (n=6 in each group). **(D-E)** Representative micrographs of H&E (left) and  $\alpha$ SMA (right) stained tissues (scale bar: 100  $\mu$ m) in Late Control **(D)** and Late Depleted **(E)** pancreatic tumor bearing mice. Sm Int: Small intestine. **(F, G)** Body weight **(F)** at the start and at the end of the treatment and tumor weight **(G)** at experiment endpoint in the indicated experimental groups. Early Control, n=28; Early Depleted, n=32; Late Control, n=27; Late Depleted, n=25. For body weight, significance was determined by One-way ANOVA with Turkey post-hoc analysis. **(H)** Representative micrographs (scale bar: 400  $\mu$ m) of lung by H&E with insert at higher magnification (scale bar: 100  $\mu$ m) from Late Control (left) and Late Depleted (right) mice. Black arrowheads point to pulmonary emboli, and corresponding quantification. Early Control, n=10; Early Depleted, n=10; Late Control, n=14; Late Depleted, n=28. Data is represented as mean  $\pm$  SEM. Unless specified otherwise, significance was determined by t-test, \*  $p < 0.05$ , \*\*  $p < 0.01$ , \*\*\*  $p < 0.001$ , \*\*\*\*  $p < 0.0001$ . ns: not significant.

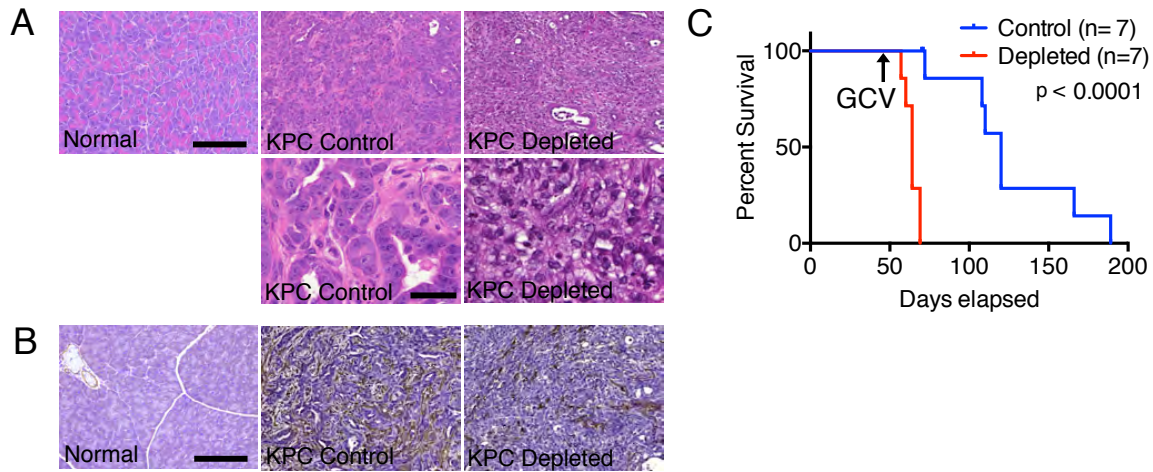

**Figure S2, Related to Figure 2. Phenotypic characterization of myofibroblast-depleted tumors from KPC mice**

(A) Representative micrographs of H&E stained tumors at 88 (Control) and 57 (Depleted) day old mice (top scale bar: 100  $\mu$ m; bottom scale bar: 50  $\mu$ m). (B) Representative micrographs of  $\alpha$ SMA labeled pancreas from the KPC (KPC Control) and KPC;  $\alpha$ SMA-tk (KPC Depleted) mice (scale bar: 100  $\mu$ m). (C) Survival analysis of KPC and KPC;  $\alpha$ SMA-tk mice. GCV: ganciclovir treatment was initiated. Statistical difference was evaluated using the Log-rank Mantel-Cox test.

**Table S1, Related to Figure 2. Patient information**

|                                                  | All           | $\alpha$ SMA rich | $\alpha$ SMA poor | p Value |
|--------------------------------------------------|---------------|-------------------|-------------------|---------|
| <b>n</b>                                         | 53            | 36                | 17                |         |
| <b>Median age at surgery (range), years</b>      | 66 (42-84)    | 65.5 (43-80)      | 66 (42-84)        |         |
| <b>Median survival (range), days</b>             | 466 (39-2579) | 605               | 310               |         |
| <b>Median primary tumor diameter (range), cm</b> | 3 (1-6.5)     | 3 (1-6)           | 3.5 (1.2-6.5)     |         |
| <b>Sex</b>                                       |               |                   |                   |         |
| Male                                             | 31            | 24                | 7                 | 0.079   |
| Female                                           | 22            | 12                | 10                |         |
| <b>Ethnicity</b>                                 |               |                   |                   |         |
| White                                            | 48            | 35                | 13                | 0.049   |
| Black                                            | 4             | 1                 | 3                 |         |
| Other                                            | 1             | 0                 | 1                 |         |
| <b>Adjuvant Radiation Therapy</b>                |               |                   |                   |         |
| yes                                              | 37            | 26                | 11                | 0.04    |
| no                                               | 6             | 6                 | 0                 |         |
| unknown                                          | 10            | 4                 | 6                 |         |
| <b>Adjuvant Chemotherapy</b>                     |               |                   |                   |         |
| yes                                              | 37            | 26                | 11                | 0.04    |
| no                                               | 6             | 6                 | 0                 |         |
| unknown                                          | 10            | 4                 | 6                 |         |
| <b>TNM Stage</b>                                 |               |                   |                   |         |
| T4N1M0                                           | 2             | 1                 | 1                 | 0.59    |
| T3N1M0                                           | 42            | 30                | 12                |         |
| T2N1M0                                           | 3             | 2                 | 1                 |         |
| T1N1M0                                           | 1             | 1                 | 0                 |         |
| Unknown                                          | 5             | 2                 | 3                 |         |
| <b>Stage</b>                                     |               |                   |                   |         |
| Stage II                                         | 46            | 33                | 13                | 0.16    |
| Stage III                                        | 3             | 2                 | 1                 |         |
| Unknown                                          | 4             | 3                 | 1                 |         |
| <b>Positive Lymph Node</b>                       |               |                   |                   |         |
| Yes                                              | 46            | 33                | 13                | 0.302   |
| no                                               | 2             | 1                 | 1                 |         |
| Unknown                                          | 5             | 2                 | 3                 |         |
| <b>Vascular Invasion</b>                         |               |                   |                   |         |
| yes                                              | 22            | 15                | 7                 | 0.921   |
| no                                               | 26            | 18                | 8                 |         |
| unknown                                          | 5             | 3                 | 2                 |         |
| <b>Perineural Invasion</b>                       |               |                   |                   |         |
| yes                                              | 46            | 30                | 16                | 0.25    |
| no                                               | 5             | 5                 | 0                 |         |
| unknown                                          | 2             | 1                 | 1                 |         |
| <b>Differentiation</b>                           |               |                   |                   |         |
| Well/Moderate                                    | 27            | 22                | 5                 | 0.031   |
| Poor                                             | 26            | 14                | 12                |         |

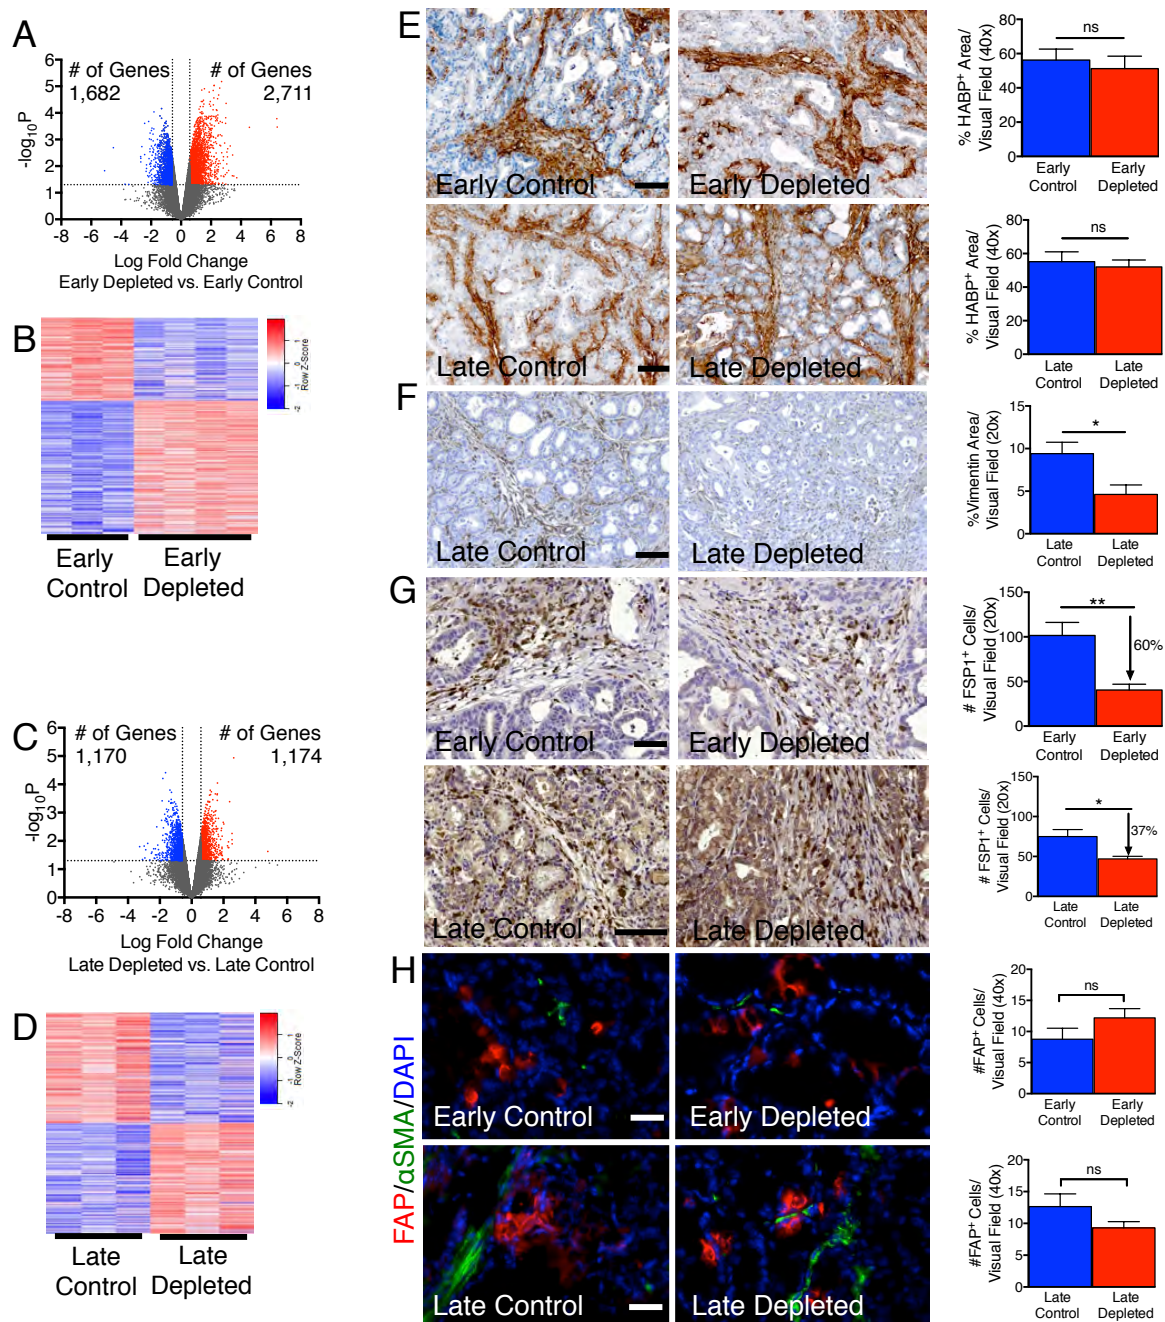

**Figure S3, Related to Figure 3. Auditing of mesenchymal cells in myfibroblast-depleted tumors**

(A, B) Volcano plot (A) of significantly differentiated genes and associated heat map (B) in early depleted PDAC tumors. (C, D) Volcano plot (C) of significantly differentiated genes and associated heat map (D) in late depleted PDAC tumors. (E) Representative micrographs (scale bar: 50  $\mu$ m) of HABP IHC and corresponding quantification (n=4 in each group). (F)

Representative micrographs (scale bar: 50  $\mu\text{m}$ ) of Vimentin IHC and corresponding quantification (n=3 in each group). **(G)** Representative micrographs (scale bar: 100  $\mu\text{m}$ ) of FSP1 IHC and corresponding quantification (n=5 in each group). **(H)** Representative micrographs (scale bar: 50  $\mu\text{m}$ ) of FAP and  $\alpha\text{SMA}$  immunostaining and corresponding quantification (n=4 in each group). Data is represented as mean  $\pm$  SEM. Significance was determined by t-test, \*  $p < 0.05$ , \*\*  $p < 0.01$ , \*\*\*  $p < 0.001$ , \*\*\*\*  $p < 0.0001$ . ns: not significant.

**Table S2, Related to Figure 3. Ontology analysis based on global gene expression of whole tumors**

| <b>Selected Gene Ontology Pathways</b>                                  | <b>p Value</b> | <b>Fold Enrichment</b> |
|-------------------------------------------------------------------------|----------------|------------------------|
| <b>Early Depletion</b>                                                  |                |                        |
| regulation of chemotaxis                                                | 0.00473        | 3.87028                |
| acute inflammatory regulation                                           | 0.03467        | 3.06220                |
| collagen fibril organization                                            | 0.00849        | 2.84347                |
| actin filament regulation                                               | 0.01663        | 2.79359                |
| collagen metabolic process                                              | 0.01551        | 2.59621                |
| patterning of blood vessels                                             | 0.02026        | 2.48804                |
| vasodilation                                                            | 0.01411        | 2.45732                |
| thymus development                                                      | 0.03749        | 2.41264                |
| blood vessel remodeling                                                 | 0.03749        | 2.41264                |
| neural crest cell migration                                             | 0.04711        | 2.30774                |
| regulation of immune effector process                                   | 0.01942        | 1.65869                |
| positive regulation of immune response                                  | 0.00586        | 1.60991                |
| immune effector process                                                 | 0.02024        | 1.52704                |
| angiogenesis                                                            | 0.02344        | 1.49656                |
| immune response                                                         | 0.01283        | 1.26778                |
| <b>Late Depletion</b>                                                   |                |                        |
| fibril organization                                                     | 0.01813        | 12.50046               |
| regulation of VEGFR signaling pathway                                   | 0.03434        | 9.37534                |
| regulation of macrophage activation                                     | 0.01395        | 7.14312                |
| regulation of T cell mediated cytotoxicity                              | 0.00848        | 5.68203                |
| thymic T cell selection                                                 | 0.00492        | 5.00018                |
| antigen processing and presentation of peptide antigen via MHC class II | 0.03397        | 3.90639                |
| regulation of mesenchymal cell proliferation                            | 0.03238        | 3.26099                |
| positive regulation of T cell differentiation                           | 0.01169        | 3.12511                |
| regulation of leukocyte mediated cytotoxicity                           | 0.02901        | 2.91677                |
| regulation of interferon-gamma production                               | 0.03869        | 2.73448                |
| T cell differentiation in the thymus                                    | 0.03869        | 2.73448                |
| positive regulation of cell adhesion                                    | 0.01907        | 2.61638                |
| B cell activation                                                       | 0.04519        | 1.92315                |
| regulation of cell adhesion                                             | 0.03591        | 1.86177                |
| regulation of leukocyte activation                                      | 0.03821        | 1.62343                |
| Associated Pathways: EMT/Migration   Angiogenesis   Immunity            |                |                        |

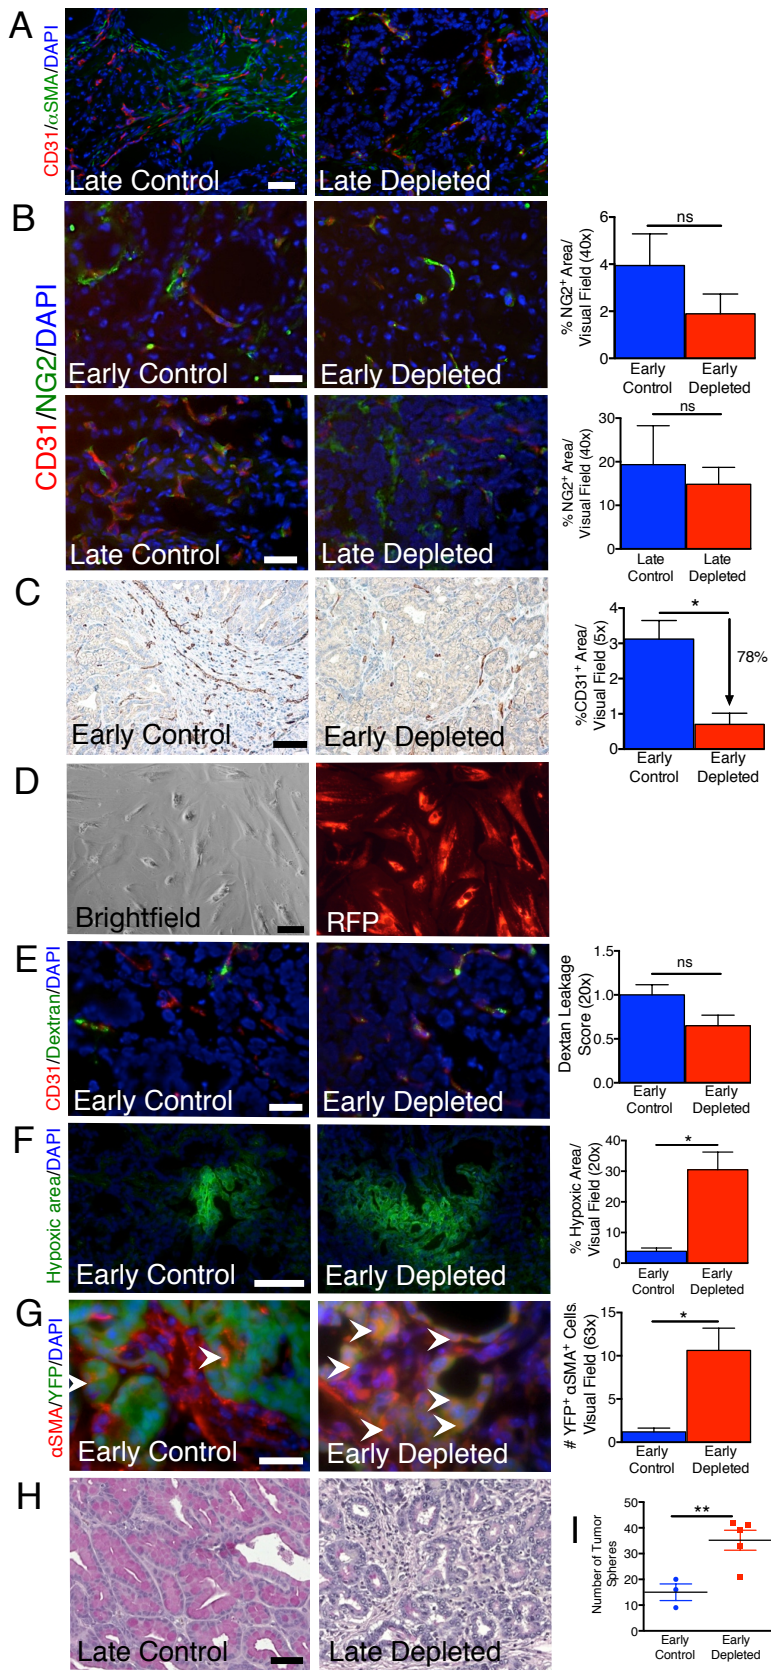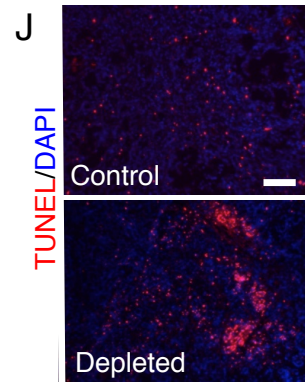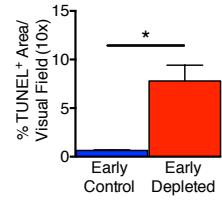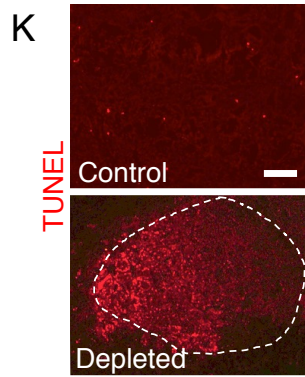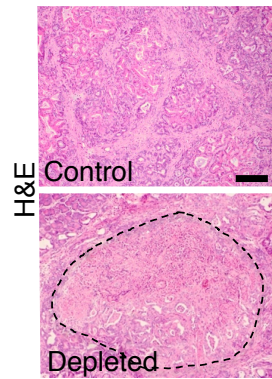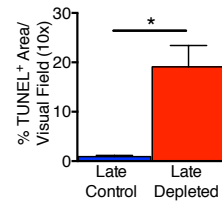



**Figure S4, Related to Figure 4. Invasive properties and enhanced apoptosis in tumors with early depletion of myofibroblasts**

(A) Representative micrographs of CD31 and  $\alpha$ SMA immunostaining (scale bar: 100  $\mu$ m). (B) Representative micrographs (scale bar: 50  $\mu$ m) of CD31 and NG2 immunostaining and corresponding quantification (n=3 in each group). (C) Representative micrographs (scale bar: 100  $\mu$ m) of CD31 IHC and corresponding quantification. Control, n=4; Depleted, n=3. (D) Brightfield and red fluorescent protein (RFP) imaging of  $\alpha$ SMA-RFP<sup>+</sup> myofibroblasts from mouse PDAC tumor (scale bar: 50  $\mu$ m). (E) Representative micrographs (scale bar: 100  $\mu$ m) of CD31 cells in tumors post FITC-Dextran injection and corresponding quantification. Control, n=3; Depleted, n=4. (F) Representative micrographs (scale bar: 100  $\mu$ m) of hypoxia indicator, Hypoxyprobe<sup>TM</sup>, and corresponding quantification. Control, n=4; Depleted, n=3. (G) Representative micrographs (scale bar: 50  $\mu$ m) of  $\alpha$ SMA<sup>+</sup> cells in tumors with YFP<sup>+</sup> lineage tagged cancer cells and corresponding quantification of dual positive cells (n=4 in each group). White arrowheads point to dual positive  $\alpha$ SMA<sup>+</sup>YFP<sup>+</sup> cancer cells. (H) Representative micrographs of mucin (mucicarmine) stained tumors (scale bar: 100  $\mu$ m) from late control and late depleted tumors. (I) Quantitation of YFP<sup>+</sup> tumor sphere formation from early control and early depleted tumors. (J) Representative micrographs of the apoptosis marker TUNEL (scale bar: 200  $\mu$ m) from early control and early depleted tumors and corresponding quantification (n=3 in each group). (K) Representative micrographs of the apoptosis marker TUNEL (scale bar: 200  $\mu$ m) from late control and late depleted tumors, matched H&E staining, and corresponding quantification (n=3 in each group). The differentiated islet is encircled. Data is represented as mean +/- SEM. Significance was determined by t-test, \* p<0.05, \*\* p<0.01, \*\*\* p< 0.001, \*\*\*\*p < 0.0001. ns: not significant.

**Table S3, Related to Figure 4. Ontology analysis based on global gene expression of normal pancreas and tumor associated myofibroblasts.**

| <b>Selected Gene Ontology Pathways</b>                             | <b>p Value</b> | <b>Fold Enrichment</b> |
|--------------------------------------------------------------------|----------------|------------------------|
| <b>Illumina</b>                                                    |                |                        |
| Regulation of T cell mediated cytotoxicity                         | 0.03942        | 1.61646                |
| T cell receptor signaling pathway                                  | 0.03902        | 1.39604                |
| actin filament organization                                        | 0.00235        | 1.32781                |
| immune response-activating cell surface receptor signaling pathway | 0.02113        | 1.30106                |
| regulation of cell migration                                       | 0.00057        | 1.28263                |
| T cell differentiation                                             | 0.00249        | 1.27616                |
| cell-substrate adhesion                                            | 0.02157        | 1.24780                |
| T cell activation                                                  | 0.00185        | 1.22628                |
| regulation of cell adhesion                                        | 0.02142        | 1.18655                |
| leukocyte differentiation                                          | 0.00473        | 1.18389                |
| extracellular structure organization                               | 0.00403        | 1.18251                |
| angiogenesis                                                       | 0.00786        | 1.17893                |
| blood vessel development                                           | 0.00043        | 1.17260                |
| vasculature development                                            | 0.00071        | 1.16385                |
| positive regulation of immune system process                       | 0.00253        | 1.16134                |
| blood vessel morphogenesis                                         | 0.00347        | 1.15928                |
| lymphocyte activation                                              | 0.00980        | 1.14253                |
| biological adhesion                                                | 0.00001        | 1.14188                |
| cell-cell adhesion                                                 | 0.00559        | 1.13700                |
| immune system development                                          | 0.00344        | 1.12879                |
| inflammatory response                                              | 0.01115        | 1.12793                |
| cytoskeleton organization                                          | 0.00540        | 1.11566                |
| cell motility                                                      | 0.00941        | 1.11559                |
| cell motion                                                        | 0.00668        | 1.10554                |
| immune response                                                    | 0.00223        | 1.10510                |
| response to wounding                                               | 0.01246        | 1.09938                |
| <b>RNA-Seq</b>                                                     |                |                        |
| T cell costimulation                                               | 0.03540        | 3.59091                |
| lymphocyte costimulation                                           | 0.03540        | 3.59091                |
| positive regulation of B cell proliferation                        | 0.00813        | 2.61157                |
| positive regulation of cell-substrate adhesion                     | 0.00366        | 2.55354                |
| vasodilation                                                       | 0.01194        | 2.34074                |
| response to hypoxia                                                | 0.00010        | 2.24432                |
| response to oxygen levels                                          | 0.00013        | 2.20979                |
| cell-matrix adhesion                                               | 0.00161        | 2.20039                |
| regulation of blood vessel size                                    | 0.00029        | 2.15455                |
| vascular process in circulatory system                             | 0.00101        | 2.07213                |
| blood coagulation                                                  | 0.00157        | 1.97232                |
| extracellular matrix organization                                  | 0.00153        | 1.94213                |
| actin cytoskeleton organization                                    | 0.00000        | 1.91515                |
| response to wounding                                               | 0.00000        | 1.83984                |
| inflammatory response                                              | 0.01452        | 1.81435                |
| positive regulation of leukocyte proliferation                     | 0.00579        | 1.76783                |
| blood circulation                                                  | 0.01610        | 1.76070                |
| circulatory system process                                         | 0.00093        | 1.75987                |
| blood vessel development                                           | 0.00014        | 1.74693                |
| vasculature development                                            | 0.01897        | 1.73276                |
| positive regulation of lymphocyte proliferation                    | 0.00807        | 1.72364                |
| immune response                                                    | 0.00000        | 1.65945                |
| acute inflammatory response                                        | 0.00000        | 1.63241                |
| regulation of cell migration                                       | 0.03455        | 1.62931                |
| angiogenesis                                                       | 0.00509        | 1.56310                |
| vessel morphogenesis                                               | 0.02414        | 1.54002                |

Associated pathways: EMT/migration/ECM remodeling, Angiogenesis, Immunity

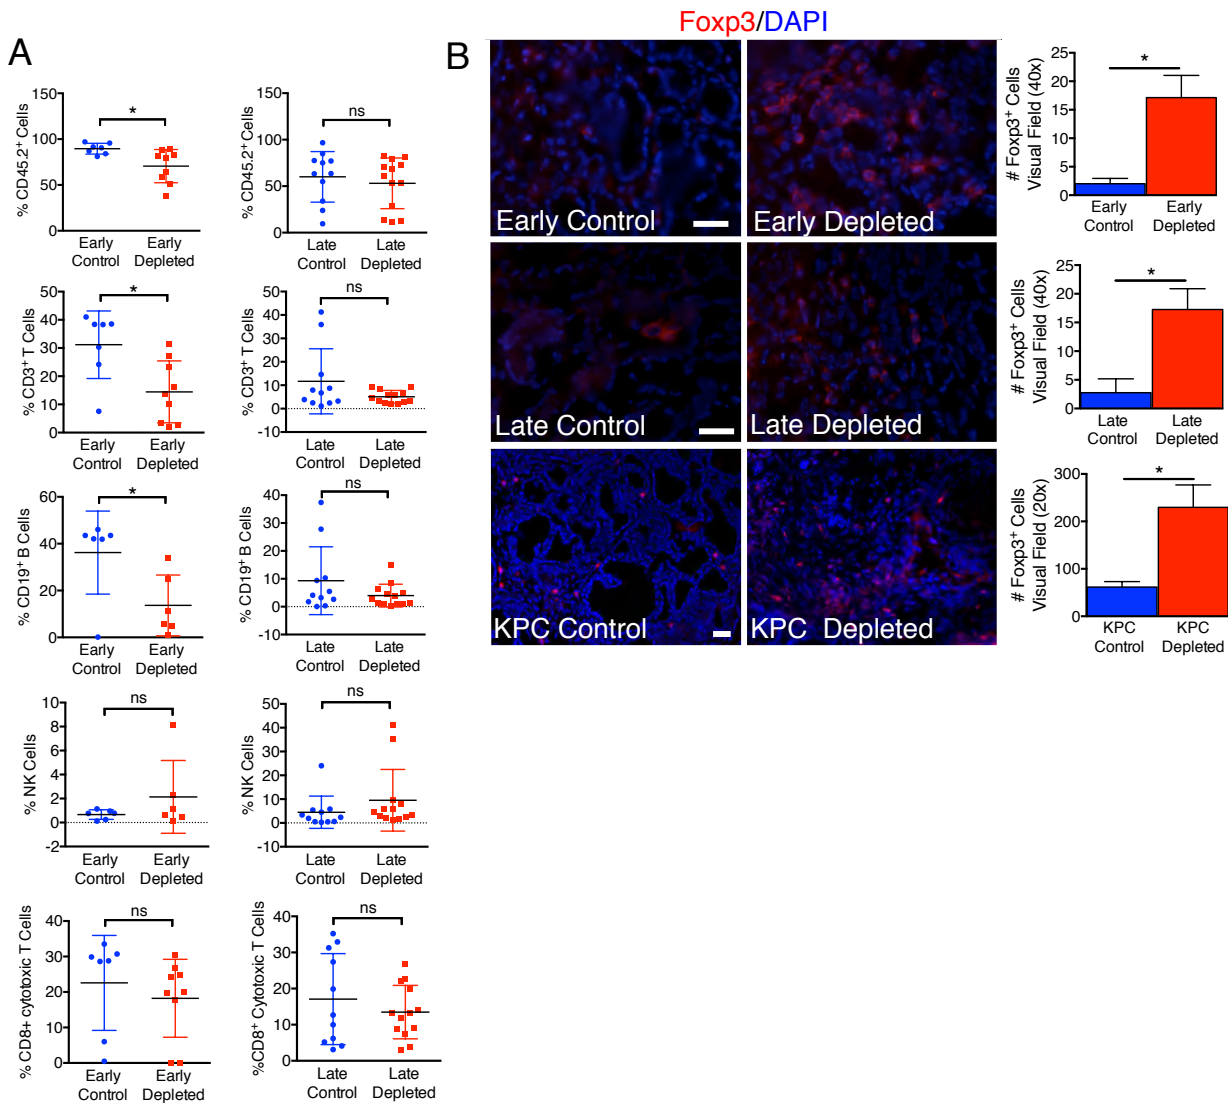

**Figure S5, Related to Figure 6. Auditing of immune infiltration in myofibroblast-depleted tumors**

(A) Tumor immune infiltrate composition assayed by flow cytometry analysis in early (left) and late (right) control and depleted tumors. (B) Representative micrographs (scale bar: 50  $\mu$ m) for Foxp3 immunostaining and corresponding quantification. Early Control, n=6; Early Depleted, n=4; Late Control, n=4; Late Depleted, n=3; KPC Control, n=3; KPC Depleted n=3. Data is represented as mean  $\pm$  SEM. Unless otherwise noted, significance was determined by t-test, \*  $p < 0.05$ , \*\*  $p < 0.01$ , \*\*\*  $p < 0.001$ , \*\*\*\*  $p < 0.0001$ . ns: not significant.

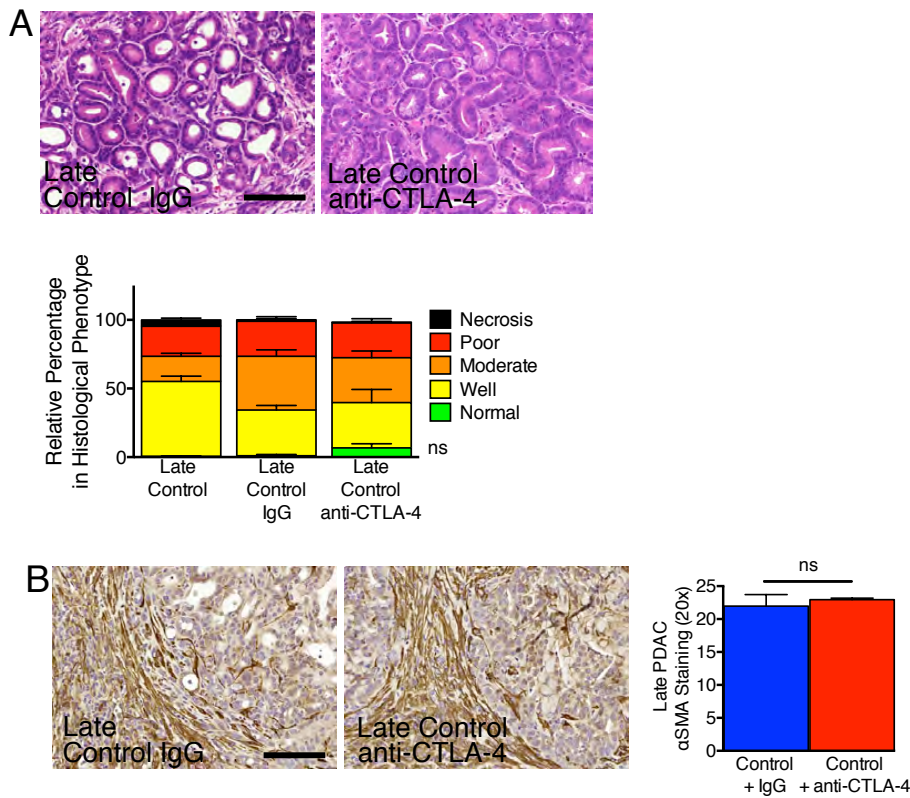

**Figure S6, Related to Figure 7.**

(A) Representative micrographs of H&E stained pancreatic samples (scale bar: 100  $\mu$ m) and percent tissue encompassed by each pathological hallmark. Late Control, n=15; Late Control + IgG, n=5; Late Control + anti-CTLA-4, n=4. Significance was determined by One-way ANOVA with Turkey post-hoc analysis. (B) Representative micrographs of  $\alpha$ SMA stained pancreatic samples (scale bar: 100  $\mu$ m) and corresponding quantification. Late Control, n= 4; Late Control+ anti-CTLA-4, n=5. Data is represented as mean +/- SEM. Unless otherwise noted, significance was determined by t-test, \* p<0.05, \*\* p<0.01, \*\*\* p< 0.001, \*\*\*\*p < 0.0001. ns: not significant.

## **Supplemental Experimental Procedures**

### ***Acquisition and analysis of <sup>18</sup>F-FDG PET/CT in mice***

Mice were fasted for 4 hours prior to imaging and were kept warm using heating pads. Animals were anesthetized with 2% isoflurane and 100% oxygen, and 400-500  $\mu$ Ci of <sup>18</sup>F-FDG was injected to each mouse via the lateral tail veins using a 30-gauge catheter. One hour later, static PET dataset for each mouse was acquired on an Argus microPET/CT scanner (Sedecal Inc., Spain) for 10 minutes in 2 bed positions using an energy window of 250-700 keV. Images were reconstructed using a 2D OSEM algorithm with 2 iterations and 16 subsets. For measuring the mean and maximum standardized uptake values (SUV<sub>mean</sub> and SUV<sub>max</sub>), three-dimensional (3D) regions of interest were drawn over the tumors and uptake values were measured using the Argus software (Sedecal Inc., Spain). CT scans were acquired following PET imaging in standard resolution. The scan parameters were set as follows: 40 kVp tube voltage, 140  $\mu$ A tube current, 360 projections, number of shots 8, axial field-of-view 80 mm. Scans were recorded without respiratory gating, and image data were reconstructed using the FeldKemp algorithm.

### ***Fibroblast culture from mouse tumors and normal pancreas***

Tumors and normal pancreas were excised and washed with PBS, transferred to a 10 cm<sup>2</sup> tissue culture plate, minced, digested with 400 U/ml type IV collagenase and 0.2 mg/ml DNase I in RPMI supplemented with 1% PSA at 37°C overnight. The next day the digested tissue was spun down and plated back with 20% FBS/RPMI, and myofibroblasts were allowed to grow until confluent.

### ***Atomic force microscopy***

Frozen tissue blocks were cut into 20  $\mu$ m thick sections. Prior to the atomic force microscopy (AFM) measurement, each section was immersed in PBS and thawed at room temperature. The samples were maintained in proteinase inhibitor in PBS (protease inhibitor cocktail, Roche

Diagnostics, 11836170001) supplemented with Propidium Iodide (SIGMA P4170, 20 µg/ml) during the AFM session. Three mice for each group were used for AFM quantification of Young's elastic modulus of the cancer-associated stroma. AFM indentations were performed using an MFP3D-BIO inverted optical AFM (Asylum Research) mounted on a Nikon TE2000-U inverted fluorescent microscope, as previously described (Lopez et al., 2011). Briefly, we used silicon nitride cantilevers with spring constant of 0.06 N/m with borosilicate glass spherical tip with 5 µm in diameter (Novascan Tech). The cantilever was calibrated using the thermal oscillation method prior to each experiment. Samples were indented at a 20 µm/s loading rate, with a maximum force of 2 nN. Five AFM force maps were typically obtained on each sample, each map as a 10x10 µm raster series of indentations utilizing the FMAP function of the IGOR PRO build supplied by Asylum Research. The Hertz model was used to determine the elastic properties of the tissue (E1). Tissue samples were assumed to be incompressible and a Poisson's ratio of 0.5 was used in the calculation of the Young's elastic modulus.

### ***Collagen content and cross-linking***

Frozen pancreatic tissues were reduced with standardized NaB<sub>3</sub>H<sub>4</sub>, hydrolyzed with 6N HCl, and total collagen content was quantified in the hydrolysate by hydroxyproline content measured by amino acid analysis, and equal amount of hydroxyproline was applied to an ion exchange HPLC. The content of reducible cross-links and aldehydes as their reduced forms based on the specific activity of NaB<sub>3</sub>H<sub>4</sub> was then determined by quantifying the fluorescent cross-links (pyridinoline and deoxypyridinoline) as an integration of the areas of the respective fluorescent peaks, standardized by the hydrolysate of an apparently pure pyridinoline containing peptides. The cross-links and cross-link precursor aldehydes were then calculated as a mole/mole of collagen basis based on the value of 300 residues of hydroxyproline per collagen molecule (Yamauchi and Shiiba, 2008).

### *Quantitative real-time PCR*

All procedures were performed as previously described (Cooke et al., 2012). Primer sequences are listed below.

| Gene                          | Sequence                                                                         |
|-------------------------------|----------------------------------------------------------------------------------|
| <i>ARP/36b4</i>               | F 5'-GGAGCCAGCGAGGCCACACTGCTG-3'<br>R 5'-CTGGCCACGTTGCGGACACCCTCC-3'             |
| $\alpha$ SMA ( <i>Acta2</i> ) | F 5'-GTCCCAGACATCAGGGAGTAA-3'<br>R 5'-TCGGATACTTCAGCGTCAGGA-3'                   |
| <i>Twist</i>                  | F 5'-CGGGAGTCCGCAGTCTTA-3'<br>R 5'-TGAATCTTGCTCAGCTTGTC-3'                       |
| <i>Snail</i>                  | F 5'-GCGGAAGATCTTCAACTGCAAATATTGTAAC-3'<br>R 5'-GCAGTGGGAGCAGGAGAATGGCTTCTCAC-3' |
| <i>Slug</i>                   | F 5'-CACATTCGAACCCACACATTGCCT-3'<br>R 5'-TGTGCCCTCAGGTTTGATCTGTCT-3'             |
| 18S                           | F 5'-GTAACCCGTTGAACCCATT-3'<br>R 5'-CCATCCAATCGGTAGTAGCG-3'                      |
| <i>Ctla4</i>                  | F 5'-CCTTTAATGAAAGCAGAGTGAACC-3'<br>R 5'-ATCTTGCTCAAAGAAACAGCAG-3'               |

## **Supplemental References**

Lopez, J.I., Kang, I., You, W.K., McDonald, D.M., and Weaver, V.M. (2011). In situ force mapping of mammary gland transformation. *Integr Biol (Camb)*. 3, 910-921.

Yamauchi, M., and Shiiba, M. (2008). Lysine hydroxylation and cross-linking of collagen. *Methods Mol Biol*. 446, 95-108.
